# Supplementary material for: Discoid lupus erythematosus skin lesion distribution and characteristics in Black patients: a retrospective cohort study
Source: PubMed Central journal article supplement — Lupus Sci Med. 2021 Dec 1;8(1):e000514. doi: 10.1136/lupus-2021-000514 (PMC8638450; doi:10.1136/lupus-2021-000514), 2021-12-01
Supplement: lupus-2021-000514supp001.pdf [file lupus-2021-000514supp001.pdf]

**Supplemental Table 1. Univariate analyses of Other DLE Lesion Characteristics Based on CLASI Scores in 112 Black and 71 Non-Black Patients**

| <b>Anatomical Location and Lesion Characteristics</b> | <b>Black Patients (N, %)</b> | <b>Non-Black Patients (N, %)</b> | <b>P-Value<sup>a</sup></b> |
|-------------------------------------------------------|------------------------------|----------------------------------|----------------------------|
| <b>Nose/Malar Area</b>                                |                              |                                  |                            |
| Erythema                                              | 46 (41%)                     | 33 (46%)                         | 0.472                      |
| Scale/Hypertrophy                                     | 18 (16%)                     | 20 (28%)                         | 0.049                      |
| Dyspigmentation                                       | 54 (48%)                     | 28 (39%)                         | 0.245                      |
| Scarring                                              | 33 (29%)                     | 21 (30%)                         | 0.987                      |
| <b>Rest of Face</b>                                   |                              |                                  |                            |
| Erythema                                              | 47 (42%)                     | 29 (41%)                         | 0.881                      |
| Scale/Hypertrophy                                     | 23 (21%)                     | 24 (34%)                         | 0.045                      |
| Dyspigmentation                                       | 60 (54%)                     | 30 (42%)                         | 0.136                      |
| Scarring                                              | 37 (33%)                     | 23 (32%)                         | 0.928                      |
| <b>Posterior Neck/Shoulders</b>                       |                              |                                  |                            |
| Erythema                                              | 13 (12%)                     | 16 (23%)                         | 0.049                      |
| Scale/Hypertrophy                                     | 6 (5.3%)                     | 11 (15%)                         | 0.021                      |
| Dyspigmentation                                       | 21 (19%)                     | 17 (24%)                         | 0.399                      |
| Scarring                                              | 8 (7.1%)                     | 11 (15%)                         | 0.071                      |
| <b>Abdomen</b>                                        |                              |                                  |                            |
| Erythema                                              | 8 (7.1%)                     | 0 (0%)                           | 0.024 <sup>b</sup>         |
| Scale/Hypertrophy                                     | 7 (6.3%)                     | 0 (0%)                           | 0.044 <sup>b</sup>         |
| Dyspigmentation                                       | 9 (8.0%)                     | 1 (1.4%)                         | 0.091 <sup>b</sup>         |
| Scarring                                              | 4 (4.0%)                     | 0 (0%)                           | 0.159 <sup>b</sup>         |
| <b>Chest</b>                                          |                              |                                  |                            |
| Erythema                                              | 12 (11%)                     | 11 (15%)                         | 0.342                      |
| Scale/Hypertrophy                                     | 6 (5.3%)                     | 8 (11%)                          | 0.143                      |
| Dyspigmentation                                       | 18 (16%)                     | 12 (20%)                         | 0.527                      |
| Scarring                                              | 10 (8.9%)                    | 5 (7.0%)                         | 0.650                      |
| <b>Back and Buttocks</b>                              |                              |                                  |                            |
| Erythema                                              | 22 (20%)                     | 15 (21%)                         | 0.808                      |
| Scale/Hypertrophy                                     | 13 (12%)                     | 10 (14%)                         | 0.622                      |
| Dyspigmentation                                       | 27 (24%)                     | 14 (20%)                         | 0.488                      |
| Scarring                                              | 16 (14%)                     | 6 (8.5%)                         | 0.237                      |
| <b>Arms</b>                                           |                              |                                  |                            |
| Erythema                                              | 27 (24%)                     | 20 (28%)                         | 0.540                      |
| Scale/Hypertrophy                                     | 24 (21%)                     | 14 (20%)                         | 0.781                      |
| Dyspigmentation                                       | 40 (36%)                     | 20 (28%)                         | 0.289                      |
| Scarring                                              | 24 (21%)                     | 14 (20%)                         | 0.781                      |
| <b>Hands</b>                                          |                              |                                  |                            |
| Erythema                                              | 11 (9.8%)                    | 9 (13%)                          | 0.546                      |
| Scale/Hypertrophy                                     | 11 (9.8%)                    | 5 (7.0%)                         | 0.517                      |
| Dyspigmentation                                       | 17 (15%)                     | 6 (8.5%)                         | 0.181                      |
| Scarring                                              | 10 (8.9%)                    | 5 (7.0%)                         | 0.650                      |
| <b>Legs</b>                                           |                              |                                  |                            |
| Erythema                                              | 10 (8.9%)                    | 7 (9.9%)                         | 0.833                      |
| Scale/Hypertrophy                                     | 9 (8.0%)                     | 5 (7.0%)                         | 0.805                      |
| Dyspigmentation                                       | 19 (17%)                     | 7 (9.9%)                         | 0.180                      |
| Scarring                                              | 8 (7.1%)                     | 4 (5.6%)                         | 0.768 <sup>b</sup>         |

## Feet

|                   |          |          |                     |
|-------------------|----------|----------|---------------------|
| Erythema          | 4 (3.6%) | 2 (2.8%) | >0.999 <sup>b</sup> |
| Scale/Hypertrophy | 4 (3.6%) | 0 (0%)   | 0.159 <sup>b</sup>  |
| Dyspigmentation   | 4 (3.6%) | 1 (1.4%) | 0.650 <sup>b</sup>  |
| Scarring          | 1 (1.4%) | 1 (0.9%) | >0.999 <sup>b</sup> |

<sup>a</sup> P-values were calculated with Chi-Square test unless otherwise specified.

<sup>b</sup> P-values were calculated with Fisher's Exact test.

Abbreviations: CLASI - Cutaneous Lupus Erythematosus Disease Area and Severity Index, DLE – Discoid lupus erythematosus, CLASI - Cutaneous Lupus Erythematosus Disease Area and Severity Index
